# Supplementary material for: An improved preparation of phorbol from croton oil
Source: PubMed Central journal article supplement (PMC5530722; doi:10.3762/bjoc.13.133), 2017-07-11

# Supporting Information

for

## An improved preparation of phorbol from croton oil

Alberto Pagani<sup>1</sup>, Simone Gaeta<sup>1</sup>, Andrei I. Savchenko<sup>2</sup>, Craig M. Williams<sup>2</sup> and  
Giovanni Appendino<sup>\*1</sup>

Address: <sup>1</sup>Dipartimento di Scienze del Farmaco, Università degli Studi del Piemonte Orientale, Largo Donegani 2, 28100 Novara, Italy and <sup>2</sup>School of Chemistry and Molecular Biosciences, University of Queensland, 4072, Brisbane, Australia

Email: Giovanni Appendino - giovanni.appendino@uniupo.it

\*Corresponding author

### ESI-HRMS and <sup>1</sup>H and <sup>13</sup>C NMR spectra of compounds **1d** and **1e**

#### Table of Contents:

| ##  | Title                                                                                      | page |
|-----|--------------------------------------------------------------------------------------------|------|
| 1.  | General Experimental Procedures.                                                           | 2    |
| 2.  | ESI HRMS of the sample <b>1d/1e</b> (2/1) in negative mode.                                | 3    |
| 3.  | ESI HRMS of the sample <b>1d/1e</b> (2/1) positive mode.                                   | 4    |
| 4.  | Tabulated NMR data for <b>1d</b> compound recorded in CDCl <sub>3</sub> at 176/700 MHz.    | 5    |
| 5.  | <sup>1</sup> H NMR spectrum and assignments for <b>1d</b> recorded in CDCl <sub>3</sub> .  | 6    |
| 6.  | <sup>13</sup> C NMR spectrum and assignments for <b>1d</b> recorded in CDCl <sub>3</sub> . | 6    |
| 7.  | DEPT spectrum and assignments for <b>1d</b> recorded in CDCl <sub>3</sub> .                | 7    |
| 8.  | COSY spectrum for <b>1d</b> recorded in CDCl <sub>3</sub> .                                | 7    |
| 9.  | HSQC edit spectrum for <b>1d</b> recorded in CDCl <sub>3</sub> .                           | 8    |
| 10. | HSQC spectrum for <b>1d</b> recorded in CDCl <sub>3</sub> , 0.7-2.0×5-45 ppm expansion.    | 8    |
| 11. | HMBC spectrum for <b>1d</b> recorded in CDCl <sub>3</sub> .                                | 9    |
| 12. | HMBC spectrum for <b>1d</b> recorded in CDCl <sub>3</sub> , 0.8-1.3×5-98 ppm expansion     | 9    |
| 13. | NOESY spectrum for <b>1d</b> recorded in CDCl <sub>3</sub>                                 | 10   |
| 14. | Tabulated NMR data for <b>1e</b> compound recorded in CDCl <sub>3</sub> at 176/700 MHz.    | 11   |
| 15. | <sup>1</sup> H NMR spectrum and assignments for <b>1e</b> recorded in CDCl <sub>3</sub> .  | 12   |
| 16. | <sup>1</sup> H NMR spectrum expansions for <b>1e</b> recorded in CDCl <sub>3</sub> .       | 12   |
| 17. | <sup>13</sup> C NMR spectrum and assignments for <b>1e</b> recorded in CDCl <sub>3</sub> . | 13   |
| 18. | <sup>13</sup> C NMR spectrum expansions for <b>1e</b> recorded in CDCl <sub>3</sub> .      | 13   |
| 19. | DEPT spectrum and assignments for <b>1e</b> recorded in CDCl <sub>3</sub> ,                | 14   |
| 20. | COSY spectrum for <b>1e</b> recorded in CDCl <sub>3</sub> .                                | 14   |
| 21. | HSQC edit spectrum for <b>1e</b> recorded in CDCl <sub>3</sub> .                           | 15   |
| 22. | HSQC spectrum for <b>1e</b> recorded in CDCl <sub>3</sub> , 0.7-3.1×5-58 ppm expansion.    | 15   |
| 23. | HSQC edit spectrum for <b>1e</b> recorded in CDCl <sub>3</sub> .                           | 16   |
| 24. | HMBC spectrum for <b>1e</b> recorded in CDCl <sub>3</sub> , 0.7-2.6×5-95 ppm expansion     | 16   |
| 25. | NOESY spectrum for <b>1e</b> recorded in CDCl <sub>3</sub> .                               | 17   |
| 26. | NOESY spectrum for <b>1e</b> recorded in CDCl <sub>3</sub> , 0.5-5.0×0.7-3.3 ppm expansion | 17   |

**1. General Experimental Procedures.** 1D and 2D NMR spectra were recorded on a Bruker 700 Avance III HD ( $^1\text{H}$  NMR - 700.47 MHz;  $^{13}\text{C}$  NMR 176.13 MHz) in  $\text{CDCl}_3$ :  $\delta$  in ppm,  $J$  in Hz. Low resolution electrospray ionisation mass spectrometry measurements (LRESIMS) were recorded in positive or negative ionization mode on a Bruker Esquire HCT (High Capacity 3D ion trap) instrument with a Bruker ESI source. High resolution electrospray ionisation (HRESIMS) accurate mass measurements were recorded in positive mode on a Bruker MicrOTOF-Q (quadrupole – Time of Flight) instrument with a Bruker ESI source. Accurate mass measurements were carried out with external calibration using sodium formate as reference calibrant.

## 2. ESI HRMS of the sample **1d/1e** (2/1) in negative mode.

### Analysis Info

Analysis Name D:\Data\Williams\APM69-neg.d  
 Method tune\_wide\_pos\_June 2016.m  
 Sample Name  
 Comment

Acquisition Date 9/8/2016 4:49:05 PM

Operator BDAL@DE  
 Instrument micrOTOF-Q 228888.00070

### Acquisition Parameter

|             |            |                       |           |                  |           |
|-------------|------------|-----------------------|-----------|------------------|-----------|
| Source Type | ESI        | Ion Polarity          | Negative  | Set Nebulizer    | 0.4 Bar   |
| Focus       | Not active | Set Capillary         | 4000 V    | Set Dry Heater   | 180 °C    |
| Scan Begin  | 50 m/z     | Set End Plate Offset  | -500 V    | Set Dry Gas      | 4.0 l/min |
| Scan End    | 3500 m/z   | Set Collision Cell RF | 550.0 Vpp | Set Divert Valve | Source    |

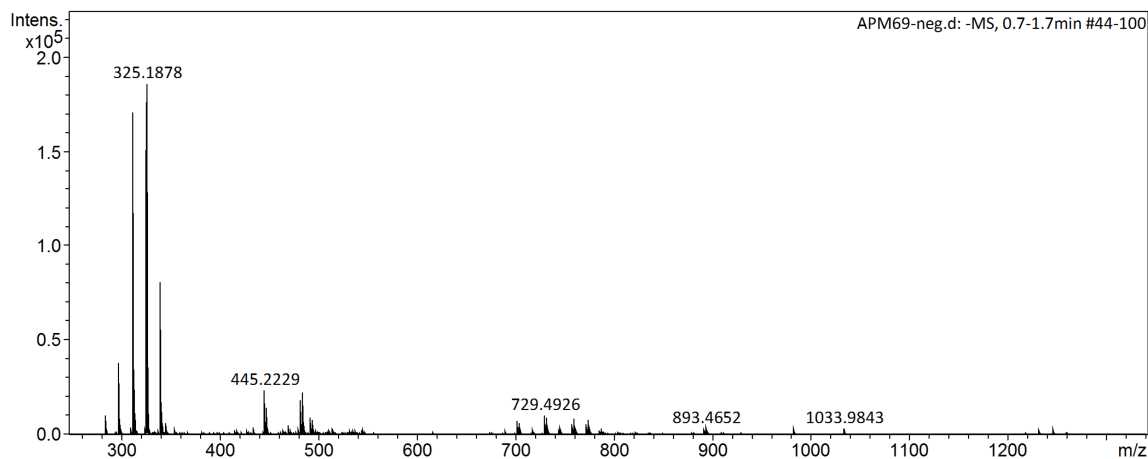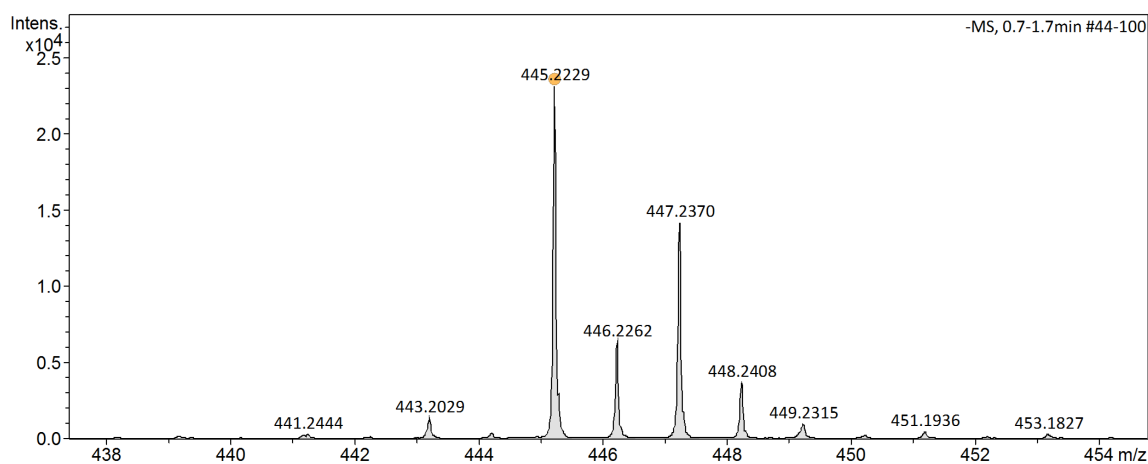

| Meas. m/z | # | Ion Formula | m/z      | err [ppm] | mSigma | # mSigma | Score  | rdB | e <sup>-</sup> Conf | N-Rule |
|-----------|---|-------------|----------|-----------|--------|----------|--------|-----|---------------------|--------|
| 445.2229  | 1 | C25H33O7    | 445.2232 | 0.7       | 291.4  | 1        | 100.00 | 9.5 | even                | ok     |

### 3. ESI HRMS of the sample **1d/1e** (2/1) positive mode.

#### Analysis Info

Analysis Name D:\Data\Williams\APM69-pos.d  
 Method tune\_wide\_pos\_June 2016.m  
 Sample Name  
 Comment

Acquisition Date 9/8/2016 4:54:41 PM

Operator BDAL@DE  
 Instrument micrOTOF-Q 228888.00070

#### Acquisition Parameter

|             |            |                       |           |                  |           |
|-------------|------------|-----------------------|-----------|------------------|-----------|
| Source Type | ESI        | Ion Polarity          | Positive  | Set Nebulizer    | 0.4 Bar   |
| Focus       | Not active | Set Capillary         | 4500 V    | Set Dry Heater   | 180 °C    |
| Scan Begin  | 50 m/z     | Set End Plate Offset  | -500 V    | Set Dry Gas      | 4.0 l/min |
| Scan End    | 3500 m/z   | Set Collision Cell RF | 550.0 Vpp | Set Divert Valve | Source    |

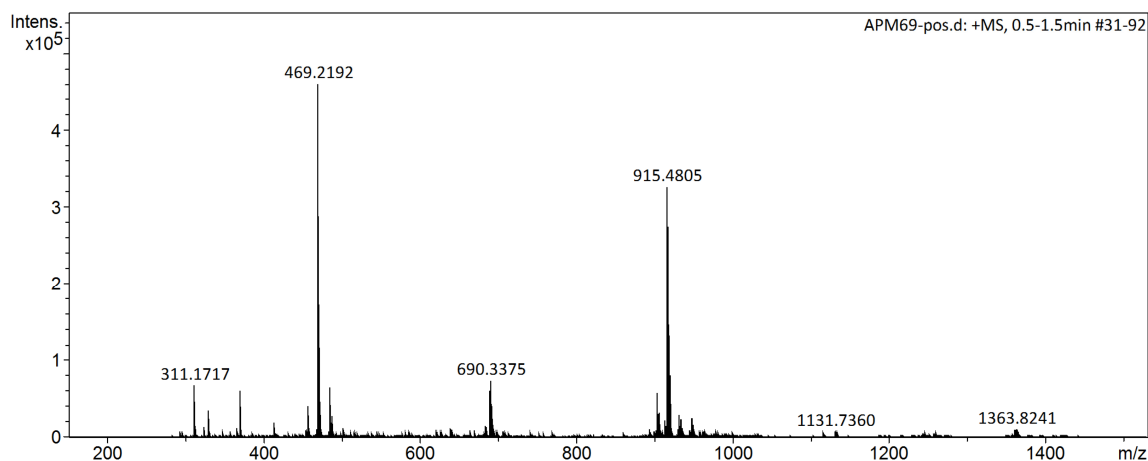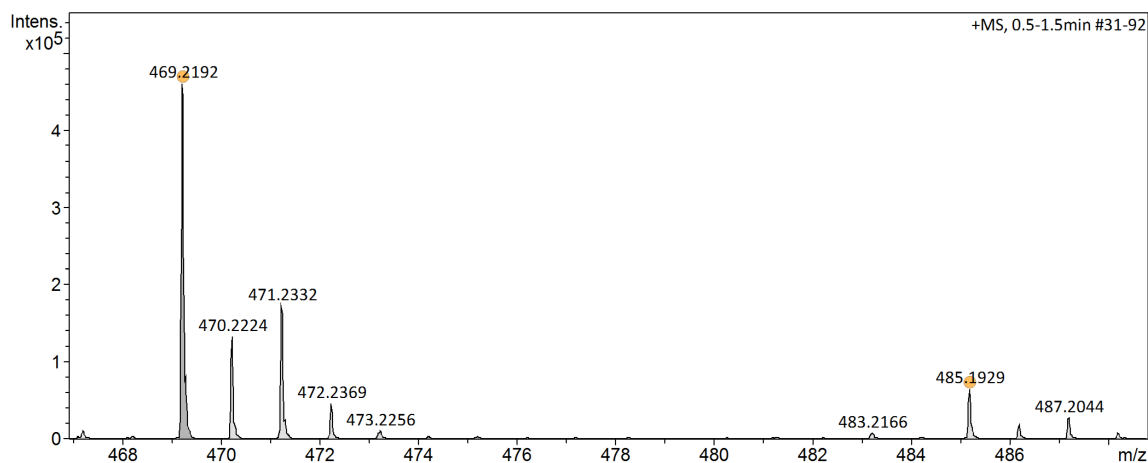

| Meas. m/z | # | Ion Formula | m/z      | err [ppm] | mSigma | # mSigma | Score  | rdb | e <sup>-</sup> Conf | N-Rule |
|-----------|---|-------------|----------|-----------|--------|----------|--------|-----|---------------------|--------|
| 469.2192  | 1 | C25H34NaO7  | 469.2197 | 1.1       | 166.9  | 1        | 100.00 | 8.5 | even                | ok     |
| 485.1929  | 1 | C25H34KO7   | 485.1936 | 1.5       | 63.3   | 1        | 100.00 | 8.5 | even                | ok     |

4. Tabulated NMR data for **1d** compound recorded in CDCl<sub>3</sub> at 176/700 MHz.

| No.  | <sup>13</sup> C | <sup>1</sup> H | Multiplicity ( <i>J</i> in Hz) |
|------|-----------------|----------------|--------------------------------|
| 1    | 160.28          | 7.56           | s                              |
| 2    | 133.41          |                |                                |
| 3    | 208.80          |                |                                |
| 4    | 73.49           |                |                                |
| 5a   | 38.74           | 2.44           | m                              |
| 5b   | 38.74           | 2.54           | m                              |
| 6    | 140.74          |                |                                |
| 7    | 129.29          | 5.63           | m                              |
| 8    | 38.99           | 3.09           | m                              |
| 9    | 79.17           |                |                                |
| 10   | 56.77           | 3.17           | br d (2.54)                    |
| 11   | 43.50           | 2.15           | m                              |
| 12   | 87.36           | 4.84           | d (9.81)                       |
| 13   | 60.83           |                |                                |
| 14   | 35.19           | 0.90           | m                              |
| 15   | 27.69           |                |                                |
| 16   | 22.27           | 1.16           | s                              |
| 17   | 17.03           | 1.01           | s                              |
| 18   | 16.08           | 1.03           | u                              |
| 19   | 10.14           | 1.77           | dd (2.91, 1.27)                |
| 20a  | 67.97           | 3.98           | m                              |
| 20b  | 67.97           | 4.03           | m                              |
| 1'   | 170.51          |                |                                |
| 2'   | 128.13          |                |                                |
| 3'   | 138.66          | 6.85           | qd (7.08, 1.27)                |
| 4'   | 14.51           | 1.78           | m                              |
| 5'   | 12.05           | 1.80           | d (1.09)                       |
| 9-OH |                 | 4.93           | br s                           |

5.  $^1\text{H}$  NMR spectrum and assignments for **1d** recorded in  $\text{CDCl}_3$ . In expansions the signals of the minor components are observed.

2016-09-04s1-700.001.001.1r.esp

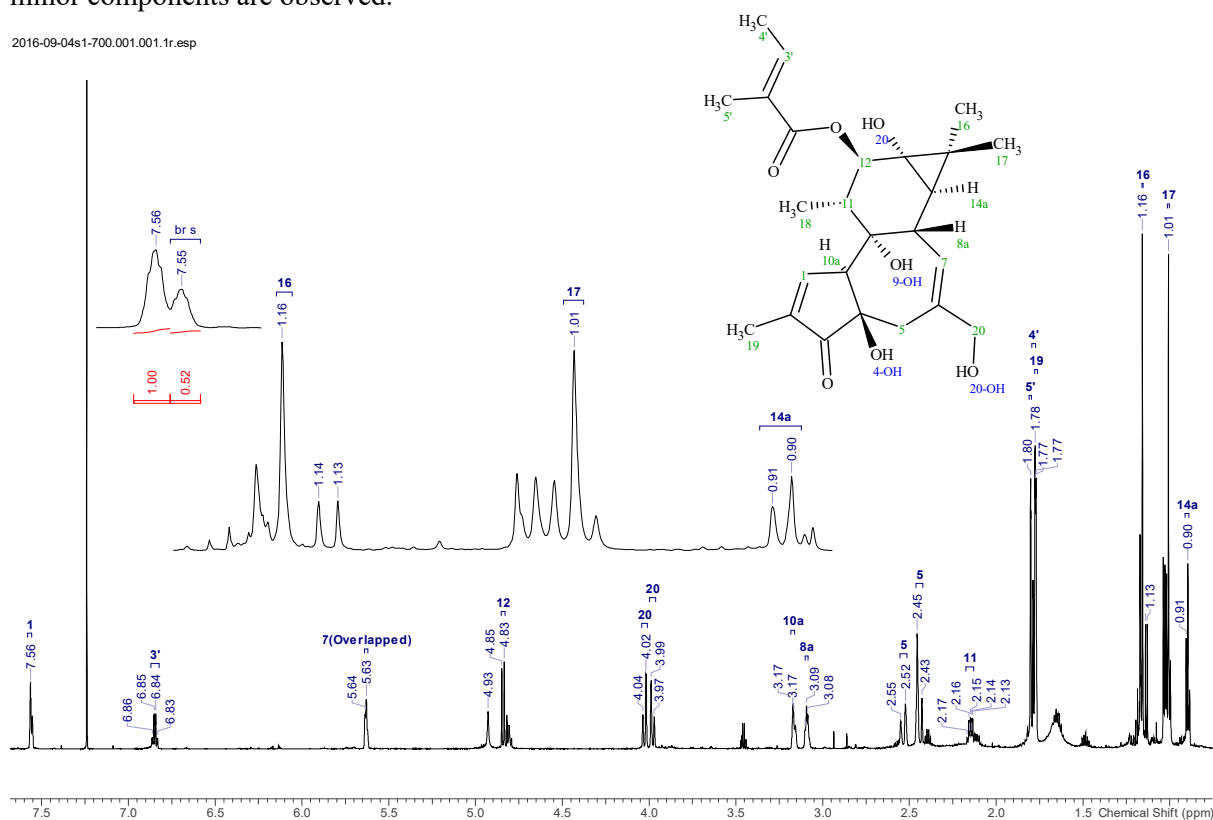

6.  $^{13}\text{C}$  NMR spectrum and assignments for **1d** recorded in  $\text{CDCl}_3$ . In expansions the signals of the minor components are observed.

2016-09-04s1-700.002.001.1r.esp

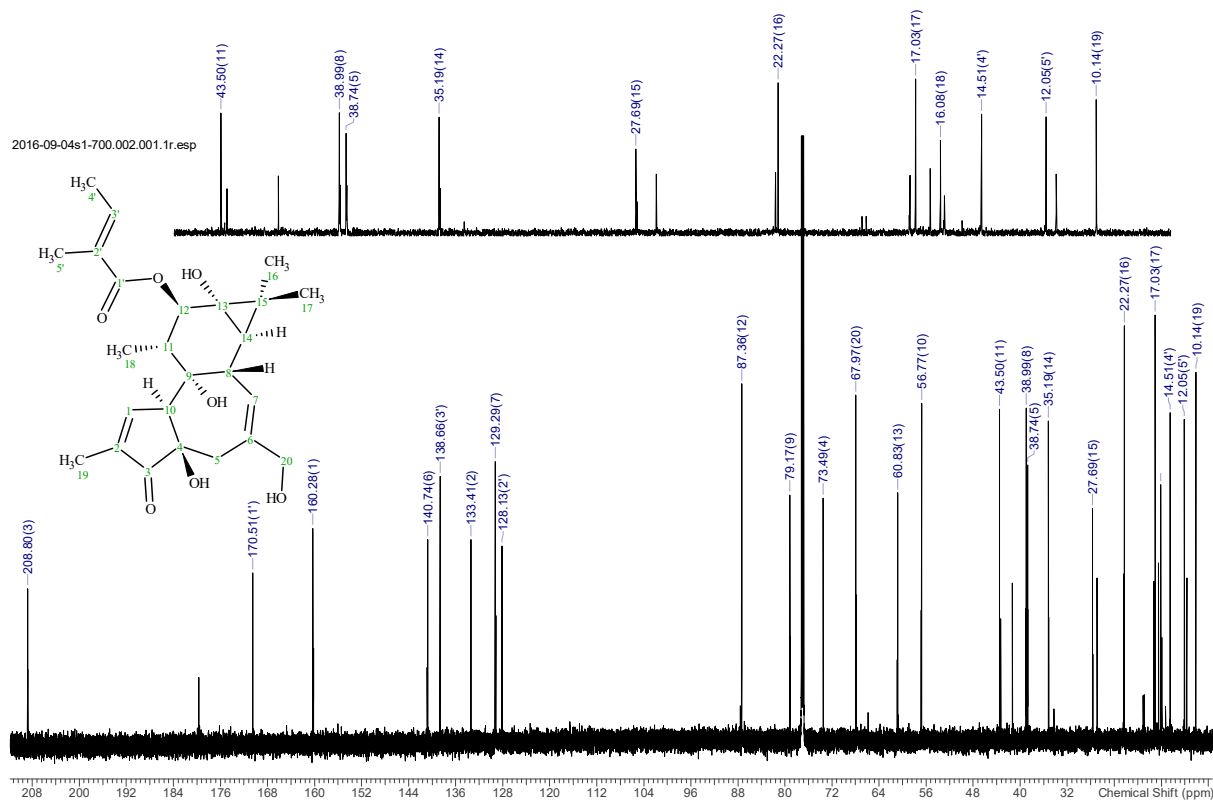

## 7. DEPT spectrum for **1d** recorded in CDCl<sub>3</sub>.

2016-09-04s1-700.003.001.1r.esp

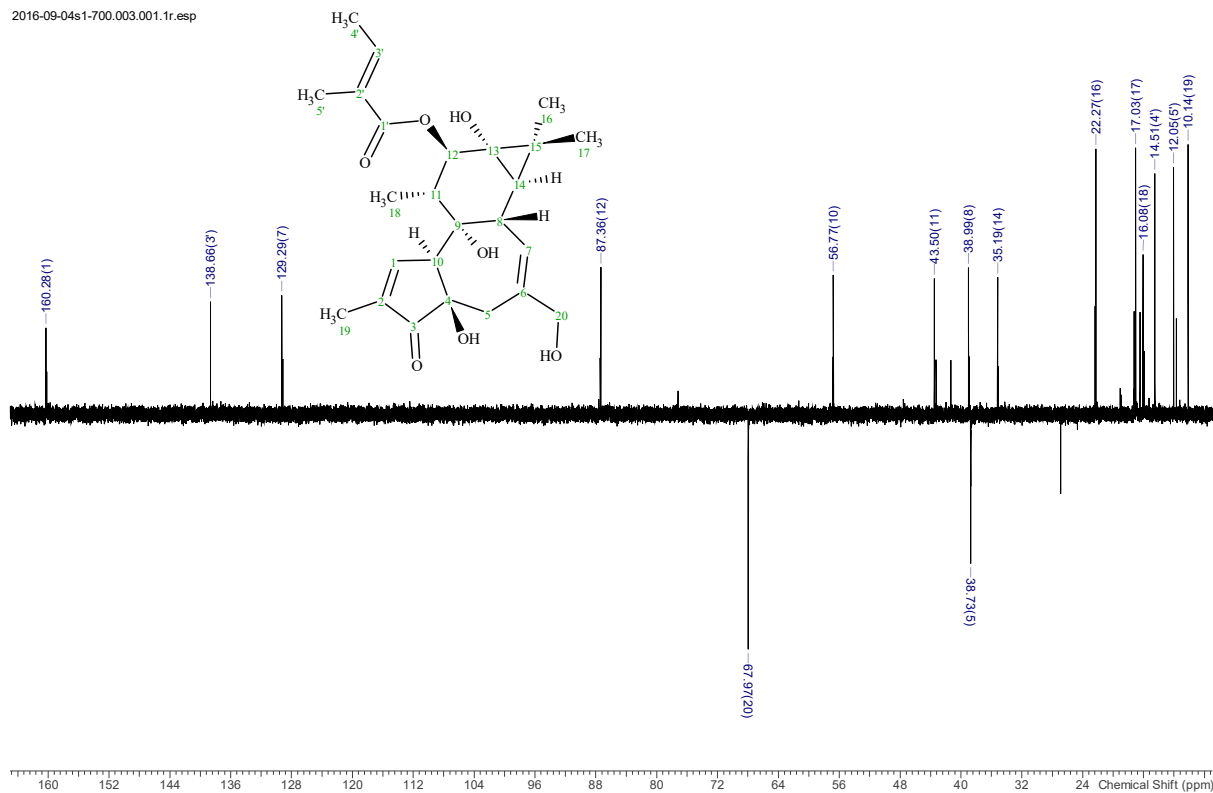

## 8. COSY spectrum for **1d** recorded in CDCl<sub>3</sub>.

2016-09-04s1-700.004.001.2r.esp

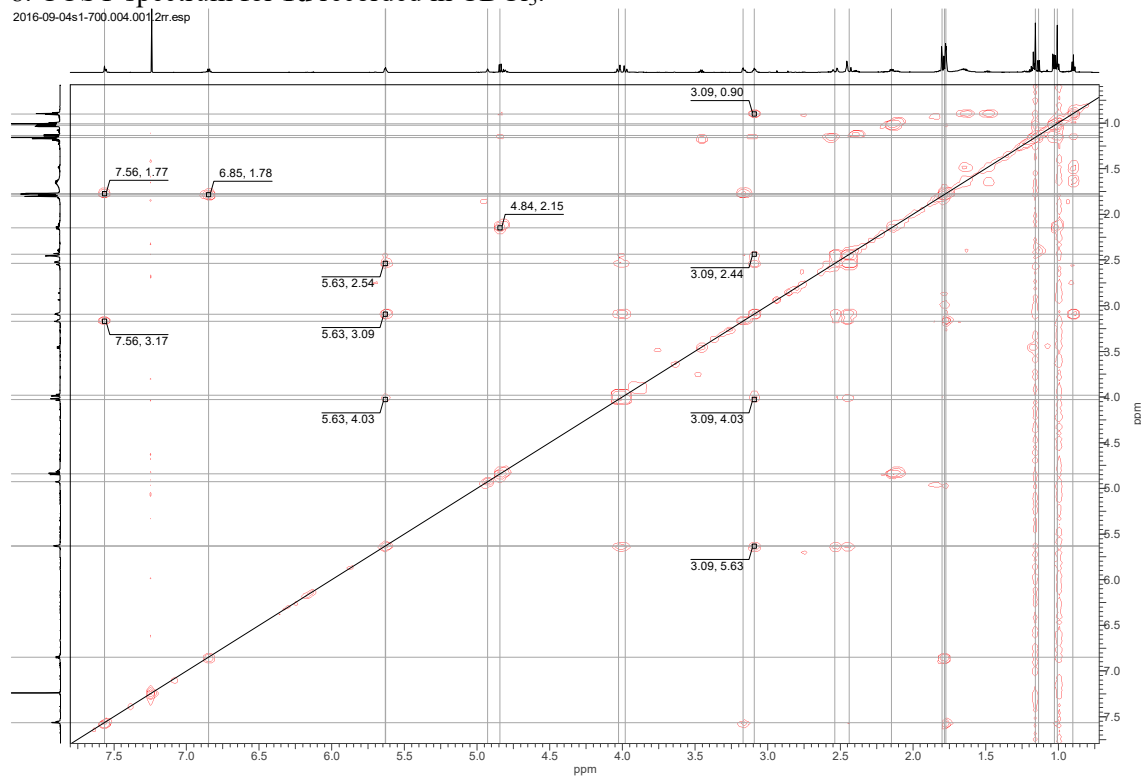

9. HSQC edit spectrum for **1d** recorded in CDCl<sub>3</sub>.

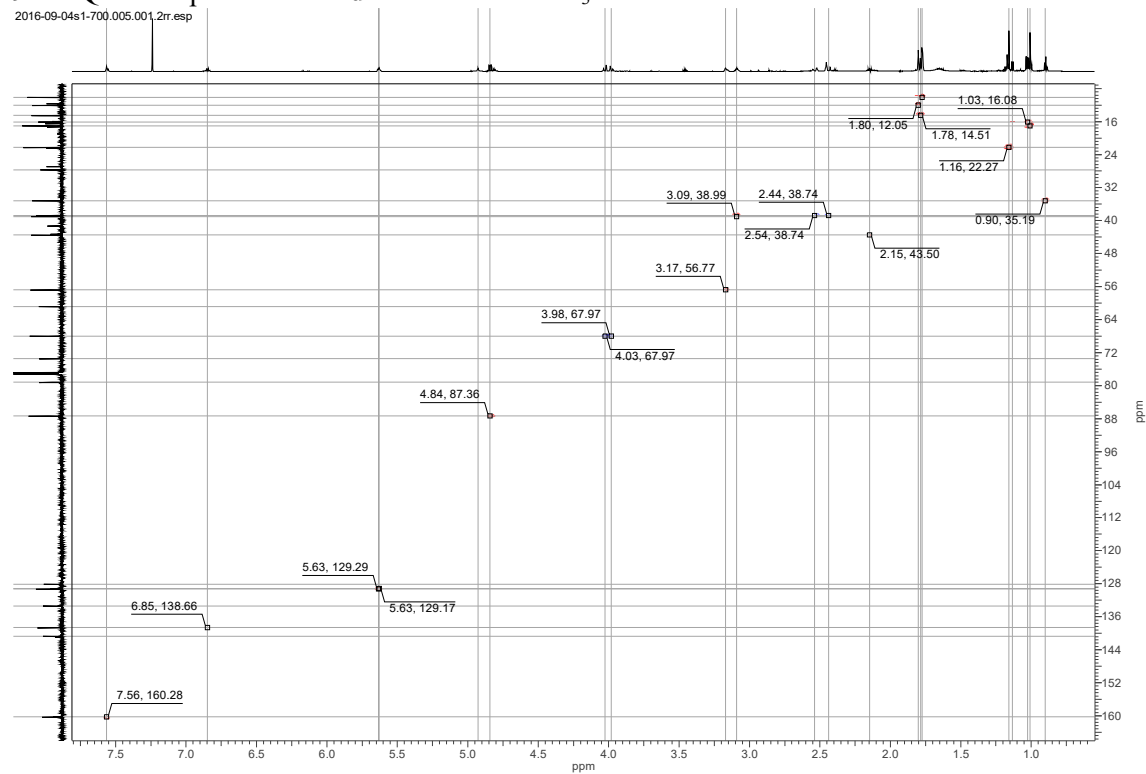

10. HSQC spectrum for **1d** recorded in CDCl<sub>3</sub>, 0.7-2.0×5-45 ppm expansion.

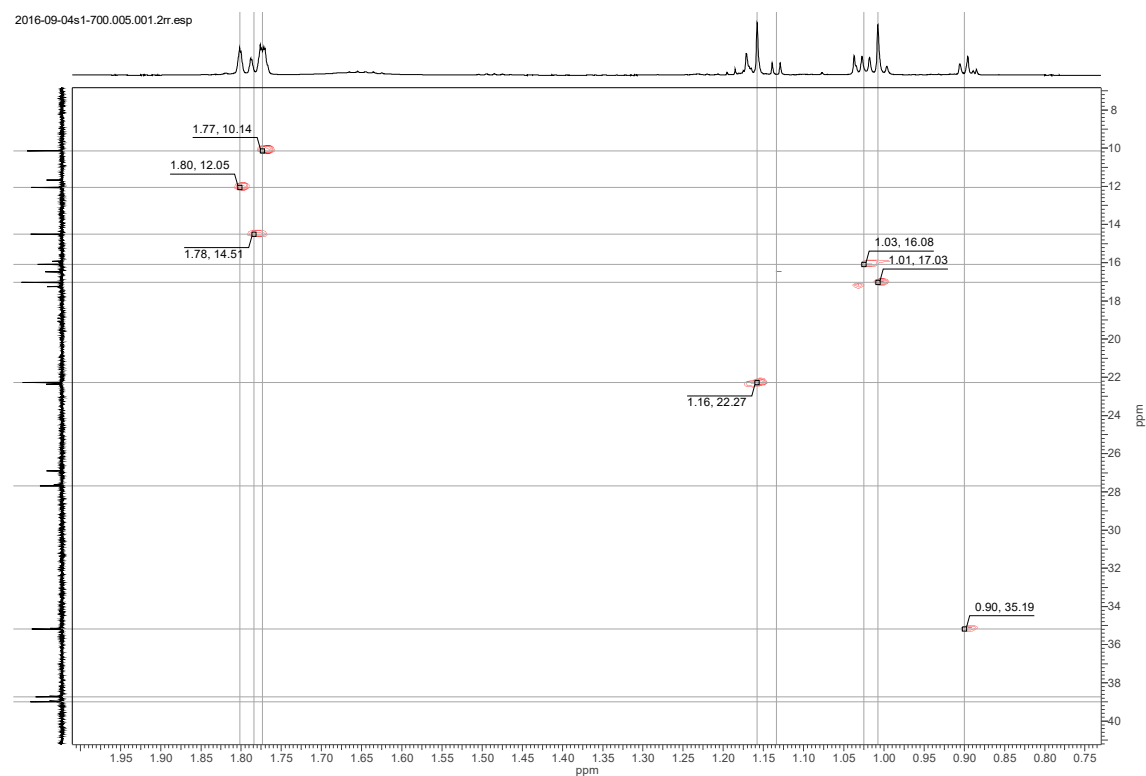



### 11. HMBC spectrum for **1d** recorded in CDCl<sub>3</sub>.

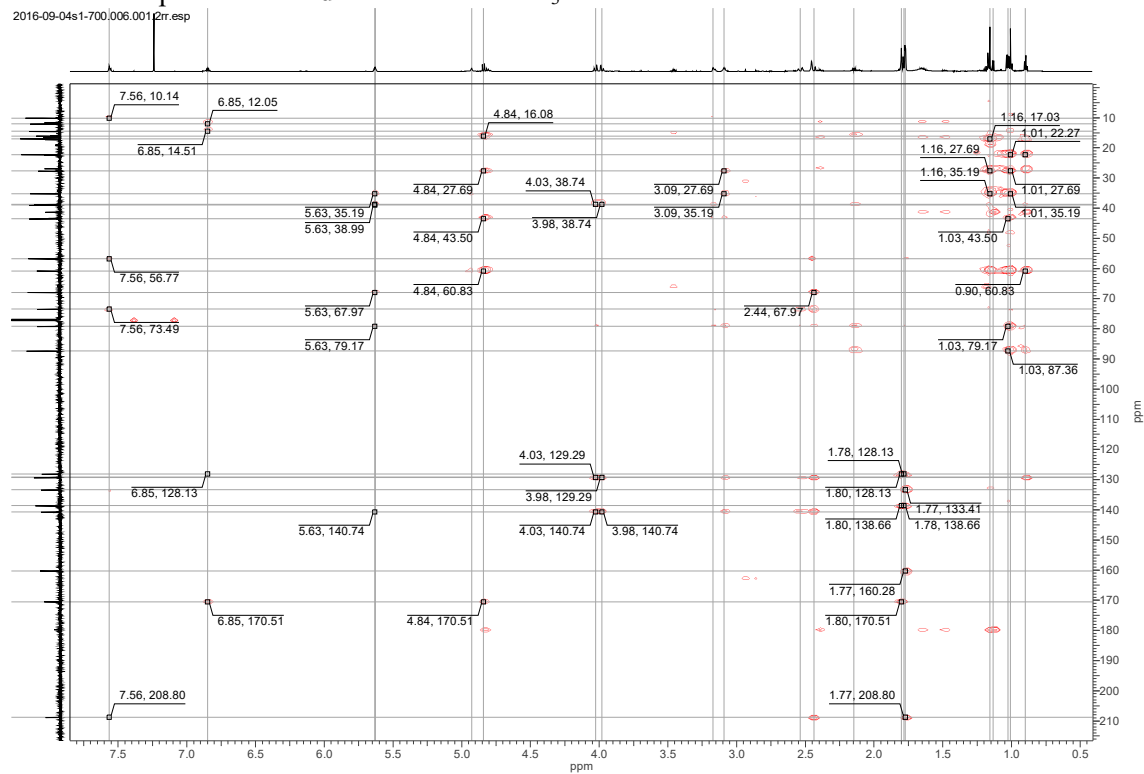

### 12. HMBC spectrum for **1d** recorded in CDCl<sub>3</sub>, 1.40-7.40×2-218 ppm.

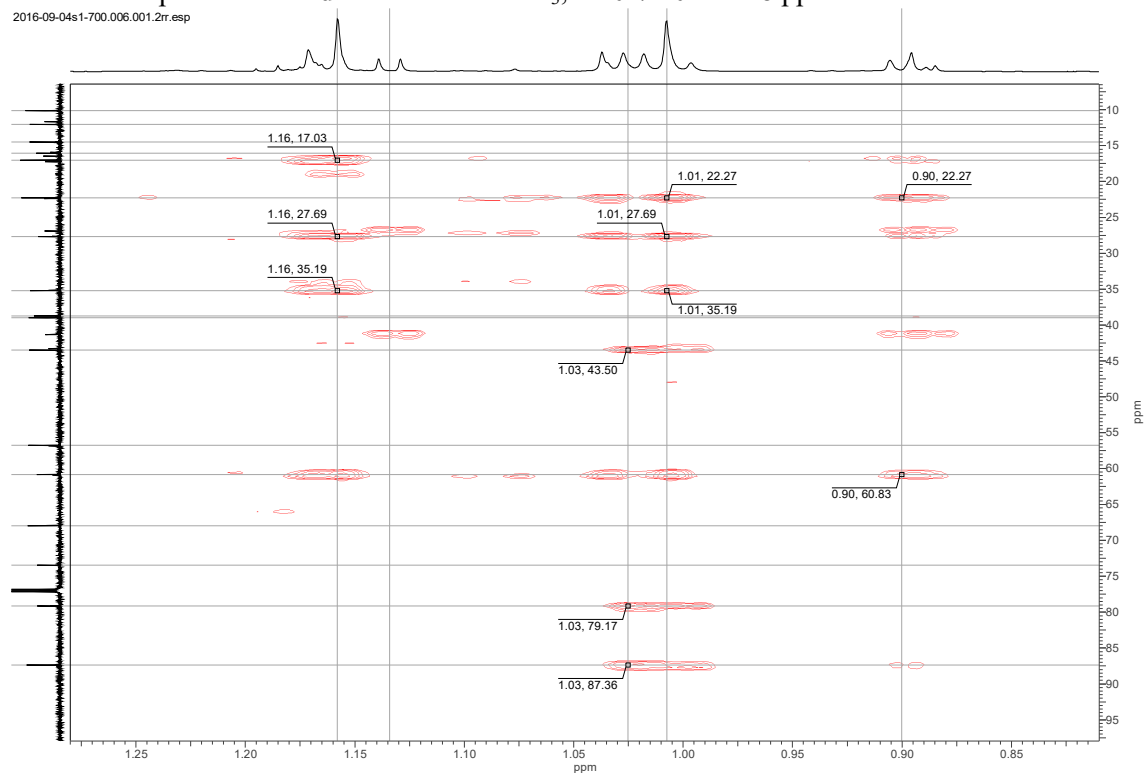

### 13. NOESY spectrum for **1d** recorded in CDCl<sub>3</sub>.

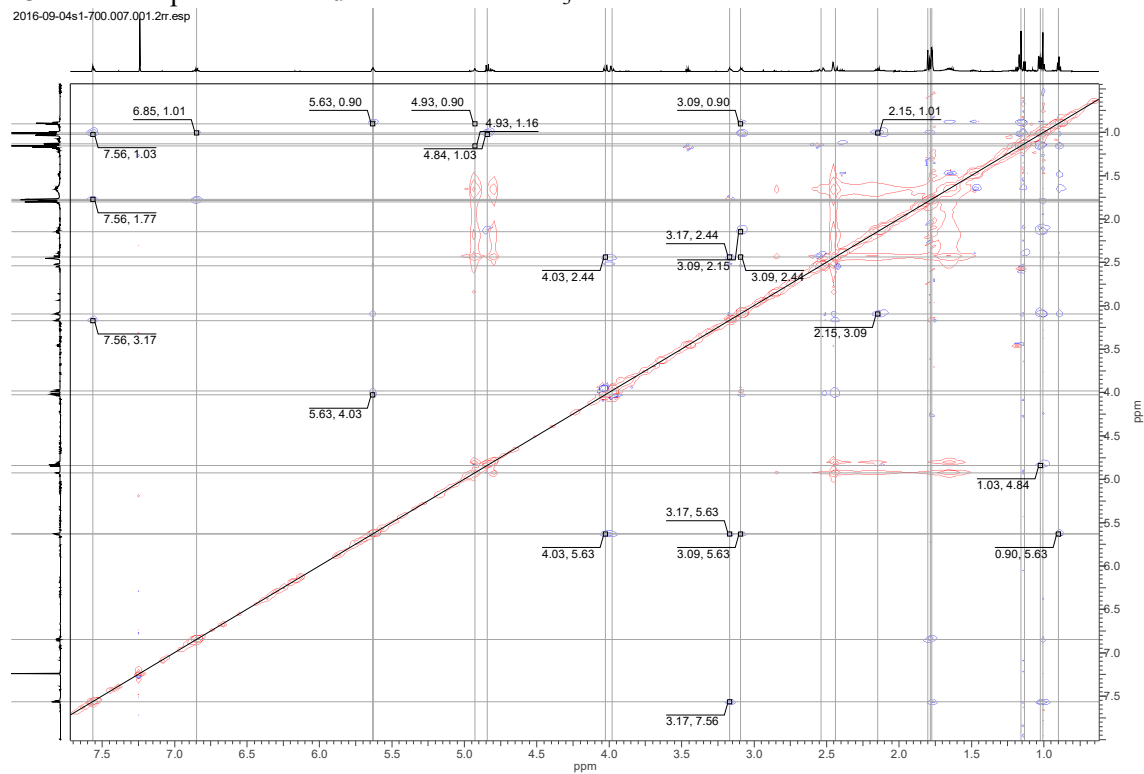

14. Tabulated NMR data for **1e** compound recorded in CDCl<sub>3</sub> at 176/700 MHz.

| No. | <sup>13</sup> C | <sup>1</sup> H | Multiplicity ( <i>J</i> in Hz) |
|-----|-----------------|----------------|--------------------------------|
| 1   | 160.18          | 7.55           | br s                           |
| 2   | 133.42          |                |                                |
| 3   | 208.77          |                |                                |
| 4   | 73.47           |                |                                |
| 5a  | 38.70           | 2.44           | br d (16.35)                   |
| 5b  | 38.70           | 2.54           | d (19.07)                      |
| 6   | 140.84          |                |                                |
| 7   | 129.17          | 5.63           | br d (5.09)                    |
| 8a  | 38.96           | 3.09           | br d (5.63)                    |
| 9   | 79.12           |                |                                |
| 10a | 56.82           | 3.16           | br d (3.27)                    |
| 11  | 43.28           | 2.11           | dq (9.99, 6.72)                |
| 12  | 87.41           | 4.83           | d (9.99)                       |
| 13  | 60.89           |                |                                |
| 14a | 35.14           | 0.89           | d (7.63)                       |
| 15  | 27.63           |                |                                |
| 16  | 22.37           | 1.17           | s                              |
| 17  | 17.24           | 1.04           | s                              |
| 18  | 15.92           | 1.00           | d (6.50)                       |
| 19  | 10.13           | 1.77           | dd (2.91, 1.27)                |
| 20a | 67.92           | 3.98           | d (12.90)                      |
| 20b | 67.92           | 4.03           | d (12.90)                      |
| 1'  | 179.68          |                |                                |
| 2'  | 41.31           | 2.39           | td (13.94, 6.99)               |
| 3'  | 26.90           | 1.65           | m                              |
| 3'  | 26.90           | 1.48           | tt (13.74, 7.43)               |
| 4'  | 11.67           | 0.90           | t (5.99)                       |
| 5'  | 16.47           | 1.13           | d (6.90)                       |



17.  $^{13}\text{C}$  NMR spectrum and assignments for **1e** recorded in  $\text{CDCl}_3$ , expansions are shown for the selected carbons.

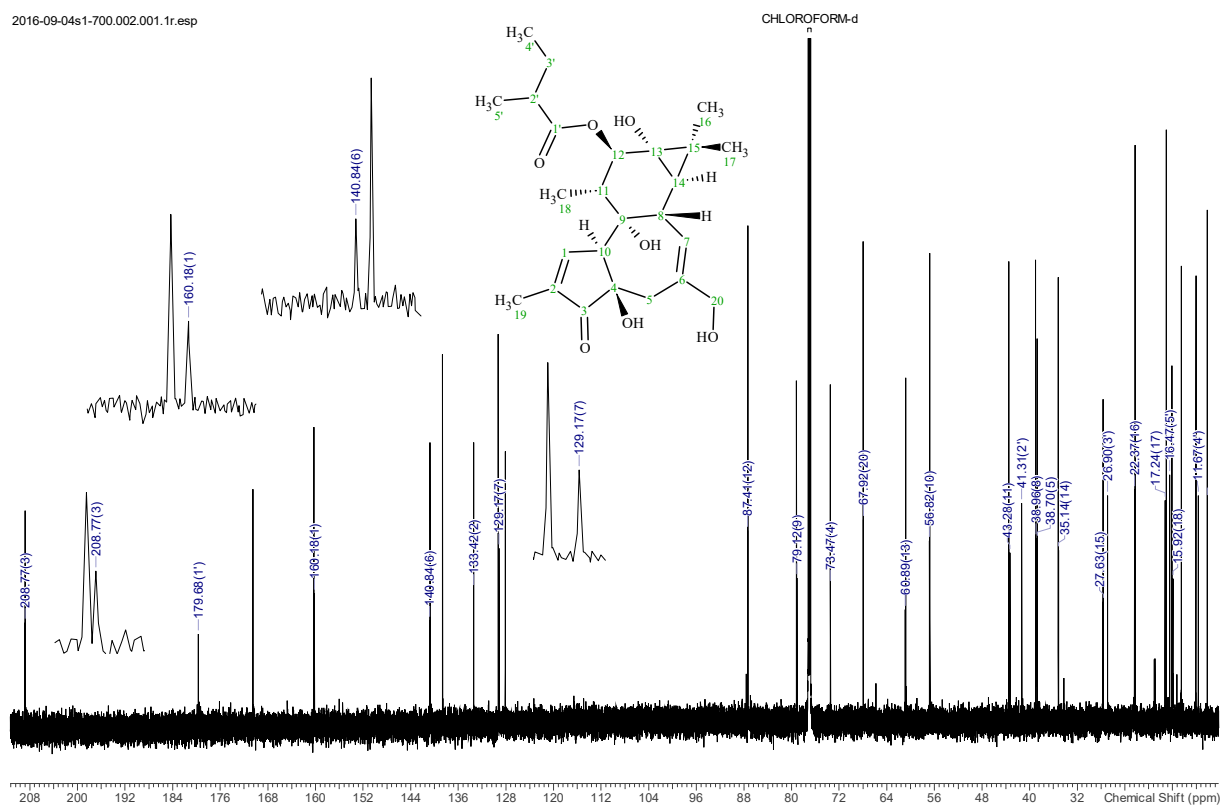

18.  $^{13}\text{C}$  NMR spectrum expansions for **1e** recorded in  $\text{CDCl}_3$ .

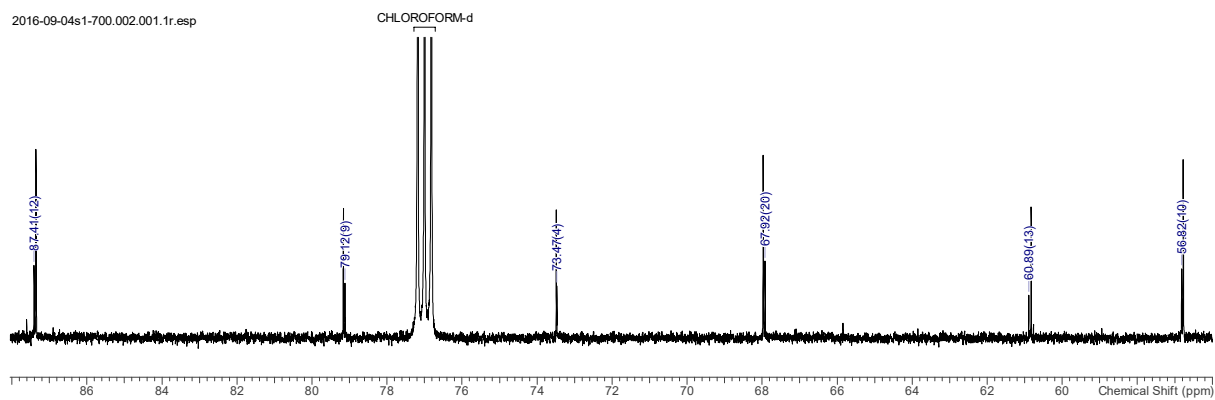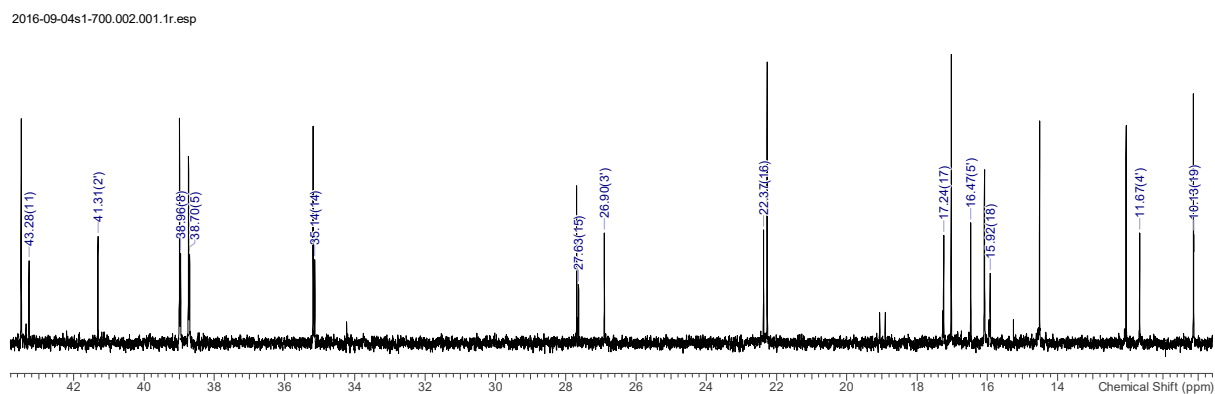



21. HSQC edit spectrum for **1e** recorded in CDCl<sub>3</sub>, peak picking was performed for the minor component.

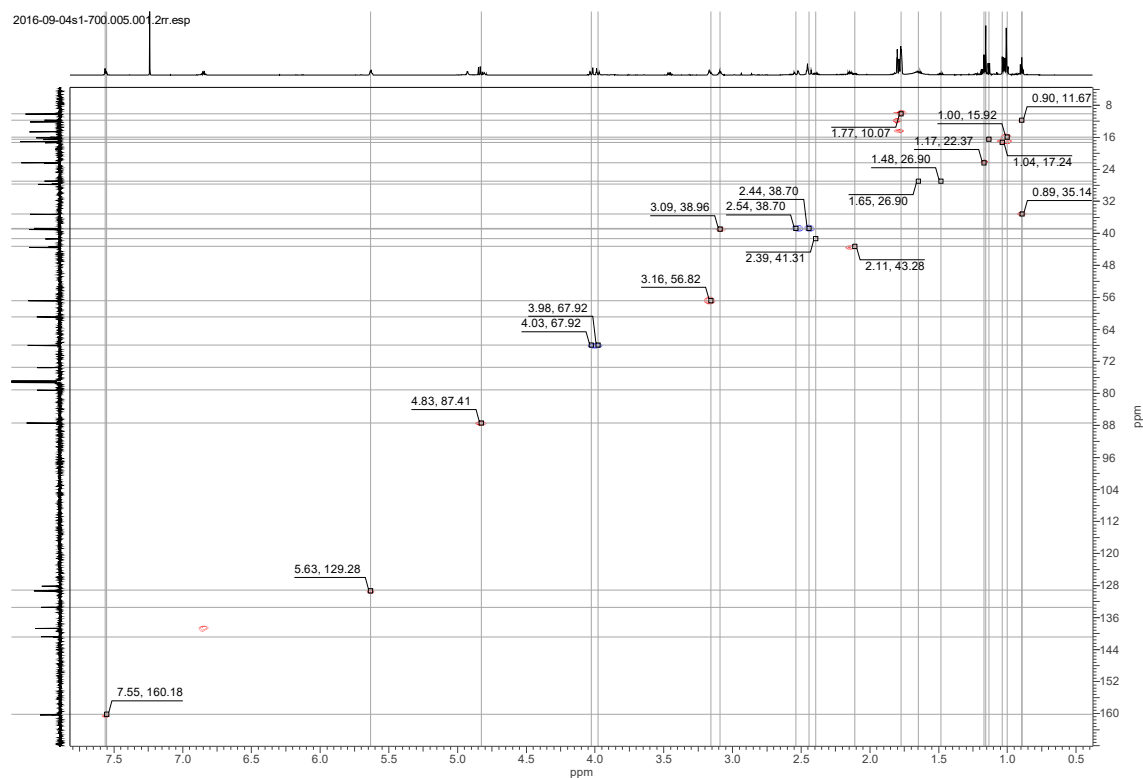

22. HSQC spectrum for **1e** recorded in CDCl<sub>3</sub>, 0.7-3.1×5-58 ppm expansion, peak picking was performed for the minor component.

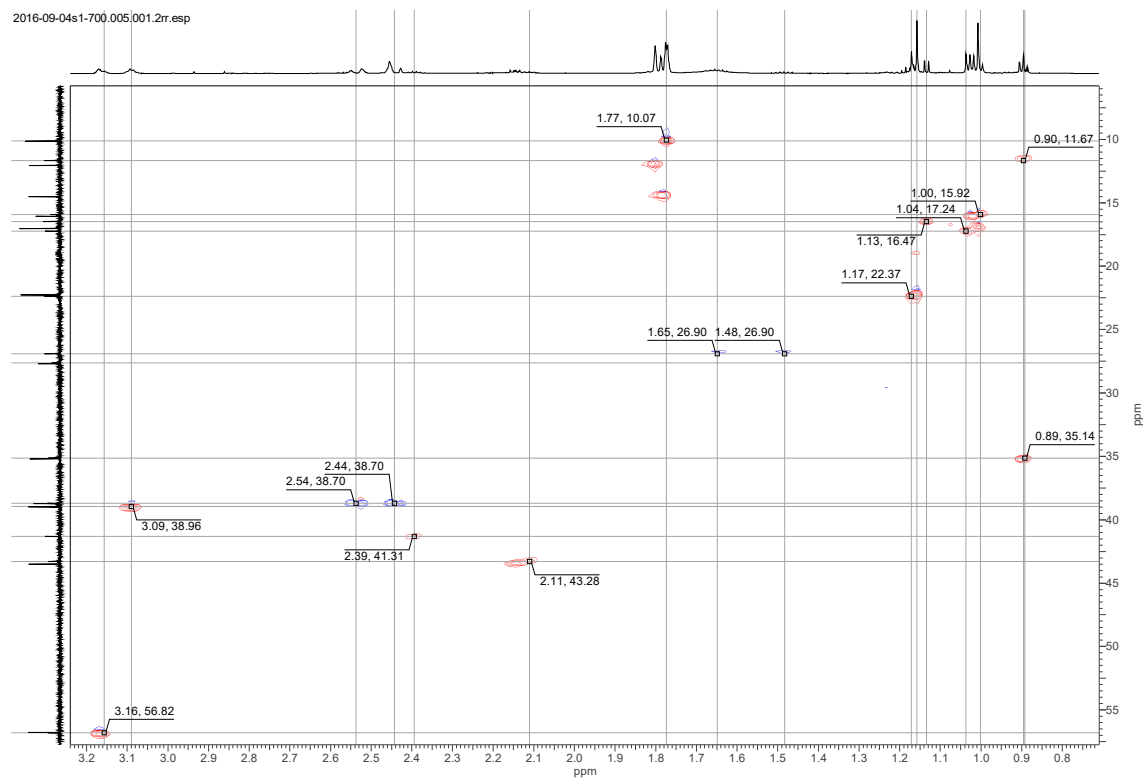

23. HMBC spectrum for **1e** recorded in CDCl<sub>3</sub>, peak picking was performed for the minor component.

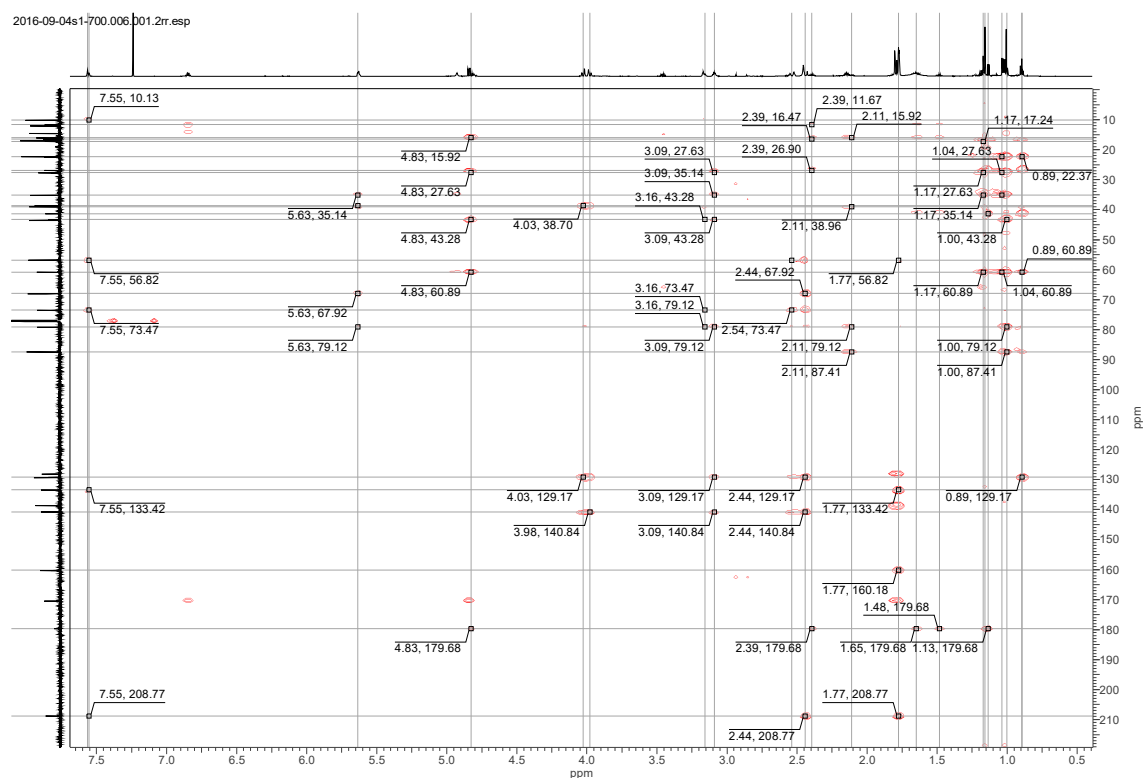

24. HMBC spectrum for **1e** recorded in CDCl<sub>3</sub>, 0.7-2.6×5-95 ppm expansion, peak picking was performed for the minor component.

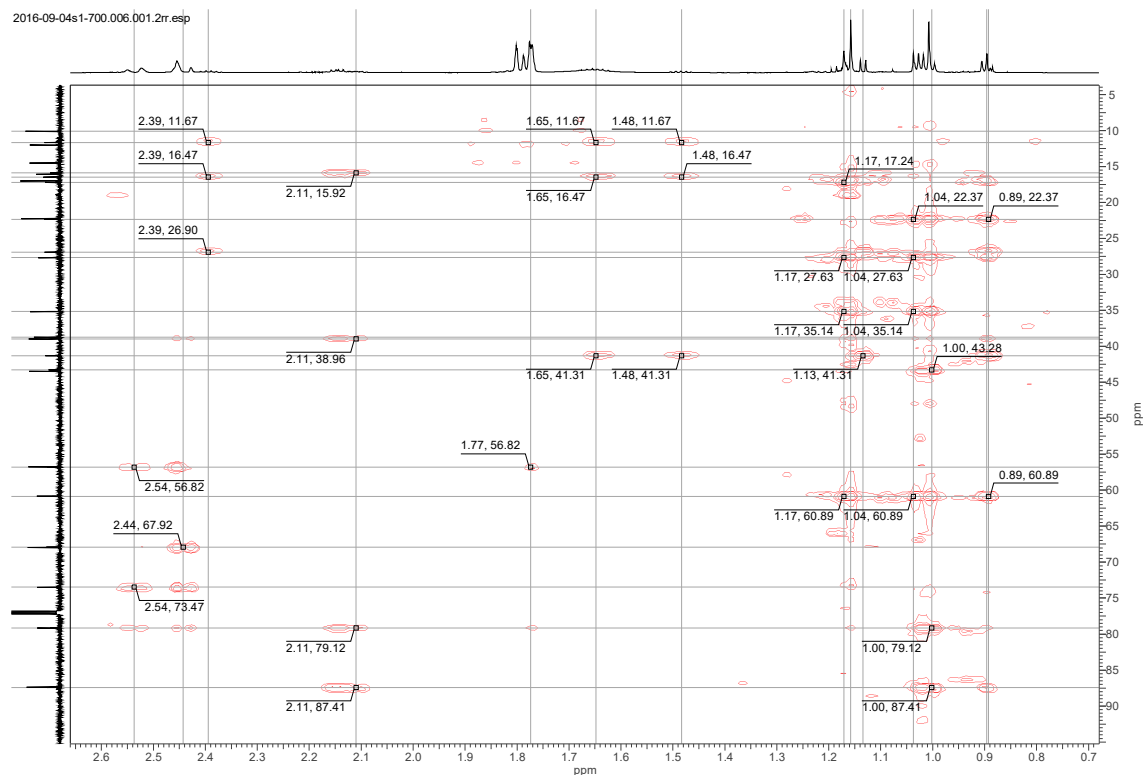



25. NOESY spectrum for **1e** recorded in CDCl<sub>3</sub>, peak picking was performed for the minor component.

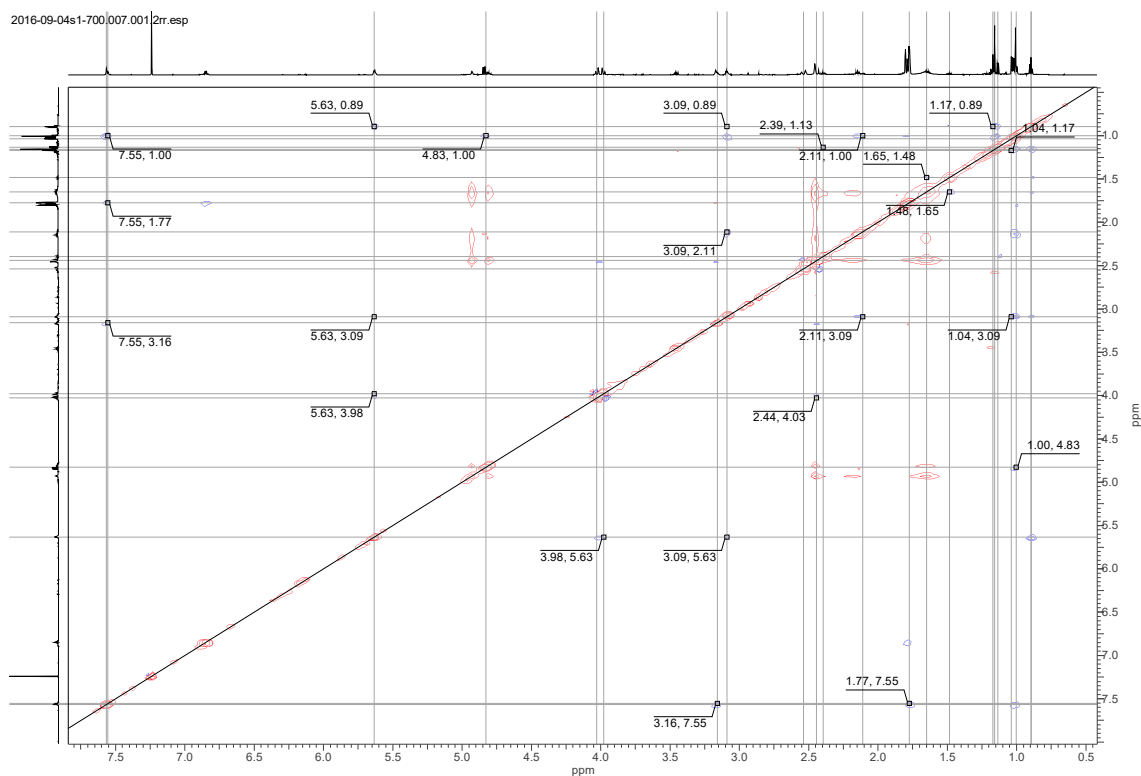

26. NOESY spectrum for **1e** recorded in CDCl<sub>3</sub>, 0.5-5.0×0.7-3.3 ppm expansion, peak picking was performed for the minor component.

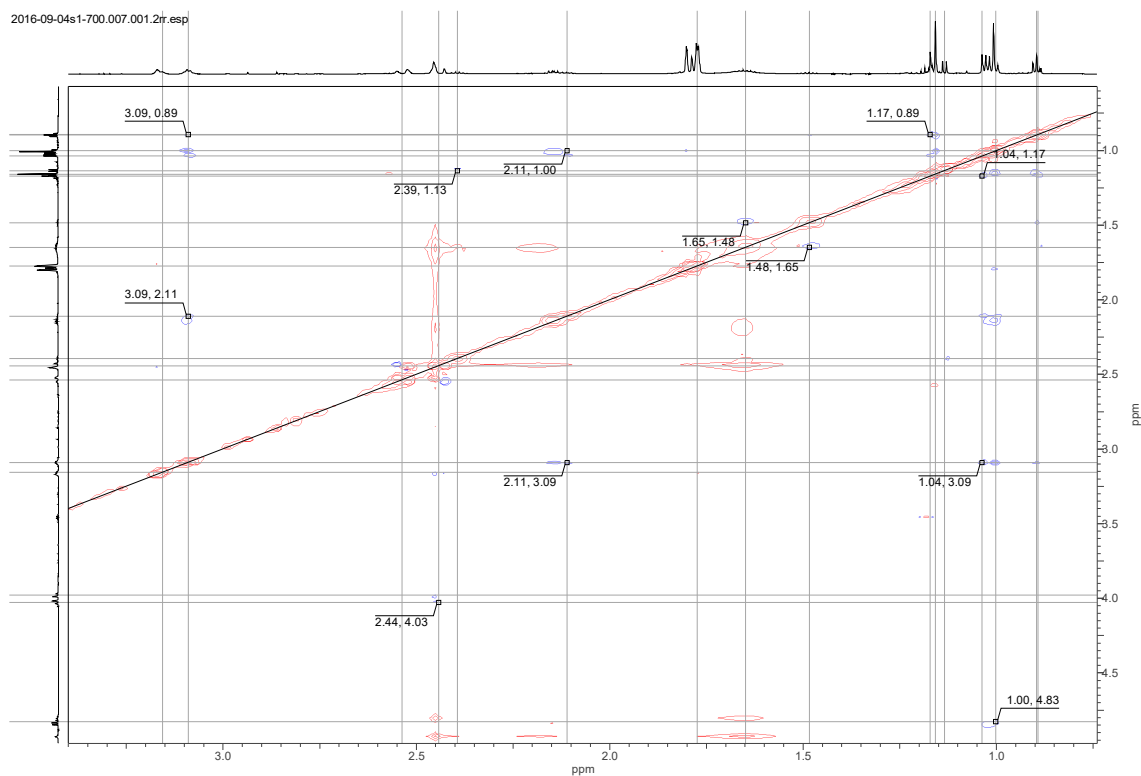

Supplement: Beilstein_J_Org_Chem-13-1361-s001.pdf [file Beilstein_J_Org_Chem-13-1361-s001.pdf]
